# Supplementary material for: The chromatin remodeling factor ISW-1 integrates organismal responses against nuclear and mitochondrial stress
Source: PubMed Central journal article supplement (PMC5703887; doi:10.1038/s41467-017-01903-8), 2017-11-28
Supplement: 41467_2017_1903_MOESM1_ESM.pdf [file 41467_2017_1903_MOESM1_ESM.pdf]

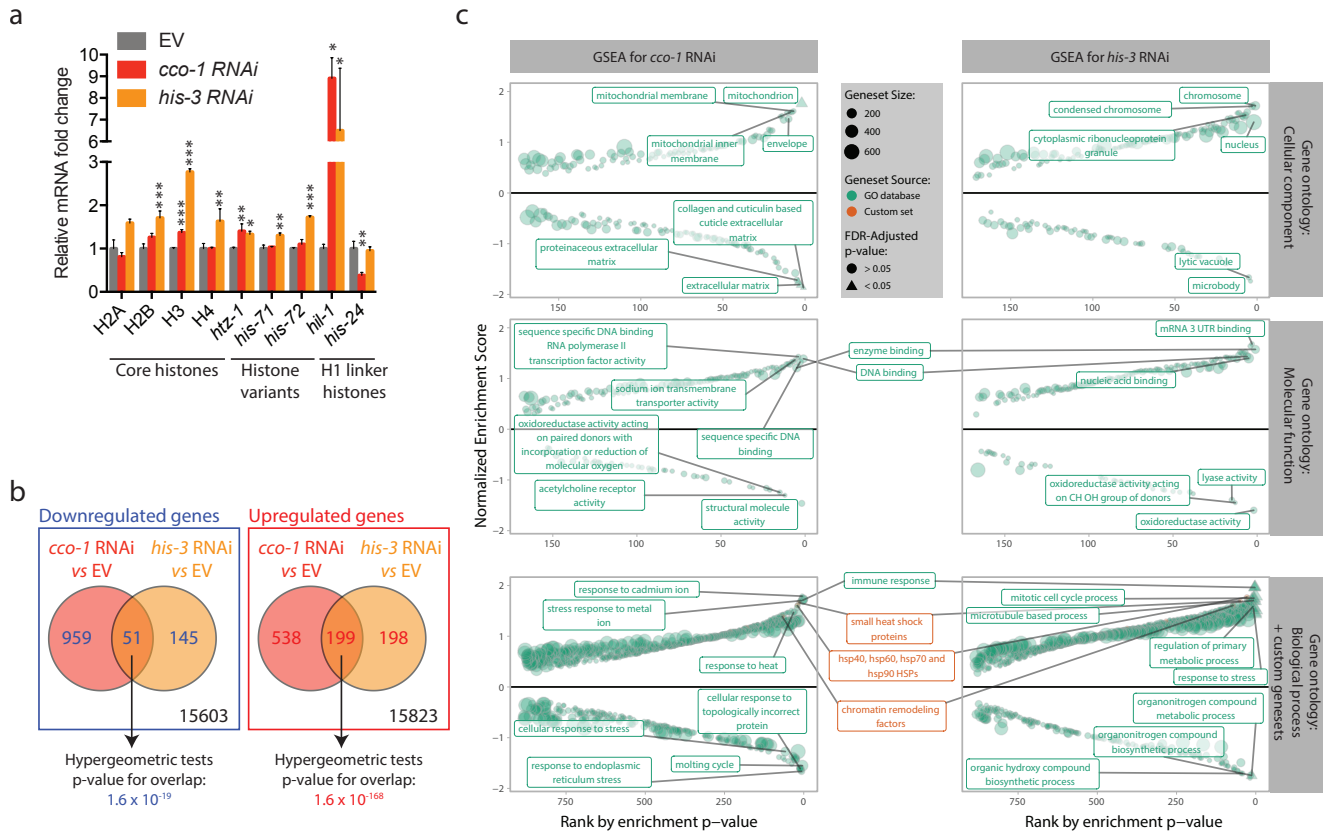

**Supplementary Figure 1 Mitochondrial- and histone stress induce partly common changes in gene expression.** (a) Histone gene expression after *cco-1* and *his-3* RNAi measured with qRT-qPCR. The H2A primer pairs have full sequence alignment with *his-12*, *his-16*, *his-30*, *his-33* and *his-43*, H2B pairs with *his-11*, *his-15*, *his-29*, *his-34* and *his-44*, H3 pairs with *his-2*, *his-6*, *his-27*, *his-49* and *his-40* (predicted pseudogene) and H4 pairs with *his-5*, *his-18*, *his-28*, *his-38* and *his-50*. N2 worms were collected for qRT-PCR analysis at L4 stage. Bars represent mRNA levels relative to empty vector with error bars indicating mean  $\pm$  s.d. of three biological replicates, each with three technical replicates (\* $P < 0.05$ , \*\* $P < 0.01$ , \*\*\* $P < 0.001$ ; one-way ANOVA with Dunnett's post test). (b) Venn diagram from RNA-seq data depicting commonly up- and downregulated genes between the treatments. (c) Gene set enrichment analysis results for the two treatment effects. Each point represents a gene set. Gene sets are ranked by increasing nominal p-value on the x-axis. The y-axis is the normalized enrichment score. Positive and negative enrichment scores indicate enrichment in up- and down-regulated genes, respectively. Custom genesets (see Supplementary Table 1) are colored orange. The size of the point represents the size of the gene set. Triangles represent gene sets that have an FDR-corrected p-value lower than 0.05.

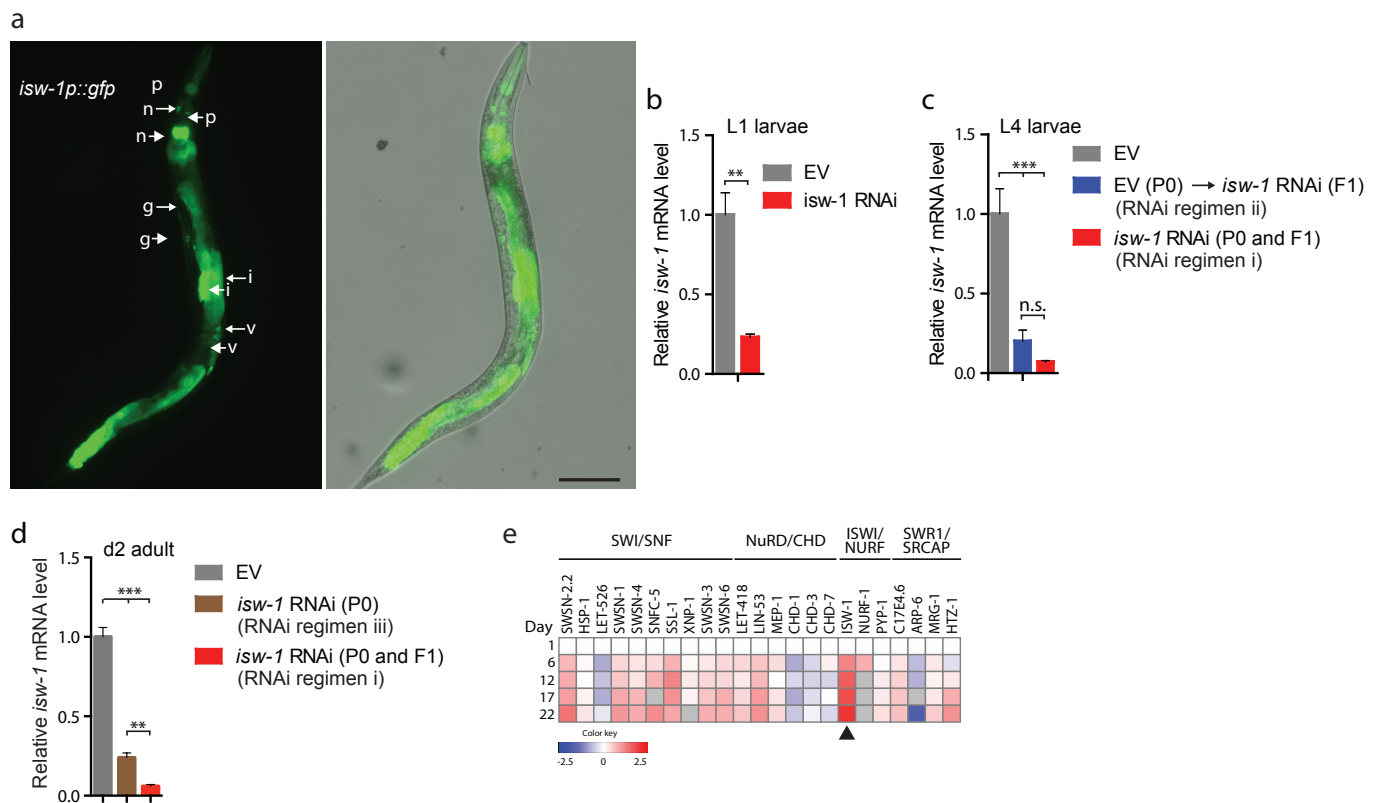

**Supplementary Figure 2 *isw-1* expression profile, the effect of different RNAi regimens on *isw-1* expression, and ISW-1 protein level upon ageing.** (a) L4 larvae of wild-type worm expressing extrachromosomal array of *isw-1p::gfp* transgene. Abbreviations: p=pharynx, n=neurons, g=gonad, i=intestine, v=vulva. N = 5. Scale bar, 100  $\mu$ m. (b) *isw-1* expression in L1 larvae of F1 generation after P0 generation was treated with EV or *isw-1* RNAi. Bars represent *isw-1* mRNA level relative to empty vector with error bars indicating mean  $\pm$  s.d. of three biological replicates, each with three technical replicates (\*\* $P < 0.01$ ; unpaired Student's *t*-test). (c) *isw-1* expression in L4 larvae of F1 generation after RNAi regimen i or ii. (d) *isw-1* expression in day 2 adult worms treated with *isw-1* RNAi by using RNAi regimen i or iii. In (c) and (d), bars represent *isw-1* mRNA level relative empty vector with error bars indicating mean  $\pm$  s.d. of three biological replicates, each with three technical replicates (\*\* $P < 0.01$ , \*\*\* $P < 0.001$ ; one-way ANOVA with Tukey's post test). (e) Heatmap showing the protein levels of different chromatin remodeling factors in aging *C. elegans* using extant data set<sup>24</sup>. Colors indicate the fold change relative to day 0 (L4 larval stage). Arrow indicates the ISW-1, whose level is strongly increased upon aging.

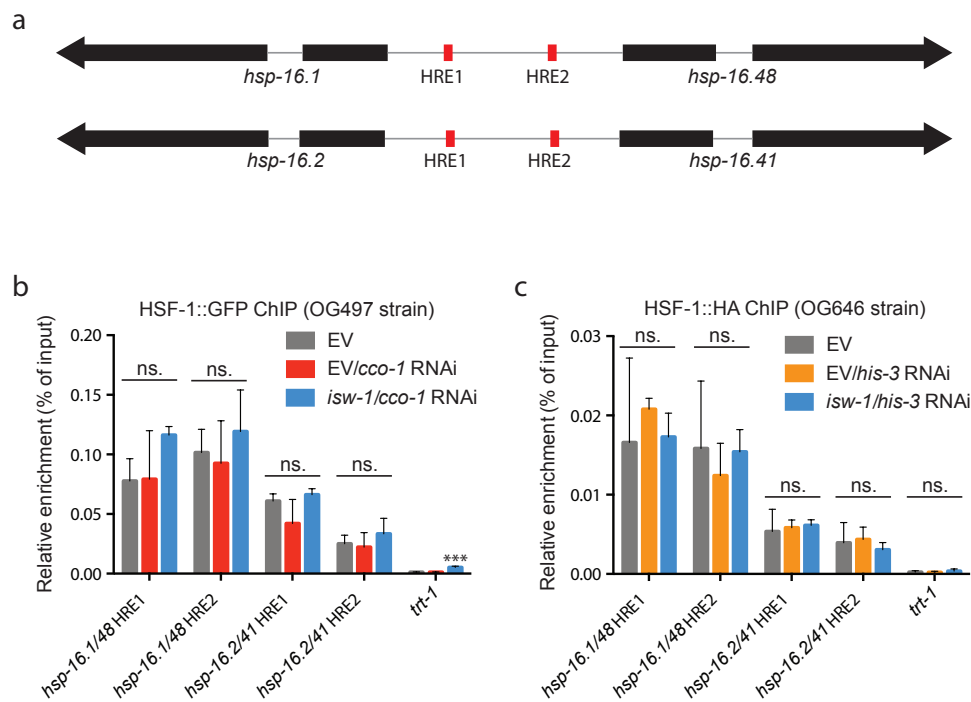

**Supplementary Figure 3 *isw-1* RNAi does not affect HSF-1 binding on sHSP promoters.** (a) Arrangement of *hsp-16* sHSP promoters and location of heat shock response elements (HRE). (b) HSF-1::GFP binding on HREs upon treatment with EV or combined EV/*cco-1* or *isw-1/ccco-1* RNAi. (c) HSF-1::HA binding on HREs upon treatment with EV or combined EV/*his-3* or *isw-1/his-3* RNAi. In (b) and (c), measurement of HSF-1 binding on telomerase (*trt-1*) promoter, which does not contain HREs, was used as a control. Bars represent enrichment relative to input with error bars indicating mean  $\pm$  s.d. of three biological replicates, each with three technical replicates (\* $P < 0.05$ , \*\* $P < 0.01$ , \*\*\* $P < 0.001$ ; one-way ANOVA with Tukey's post test).

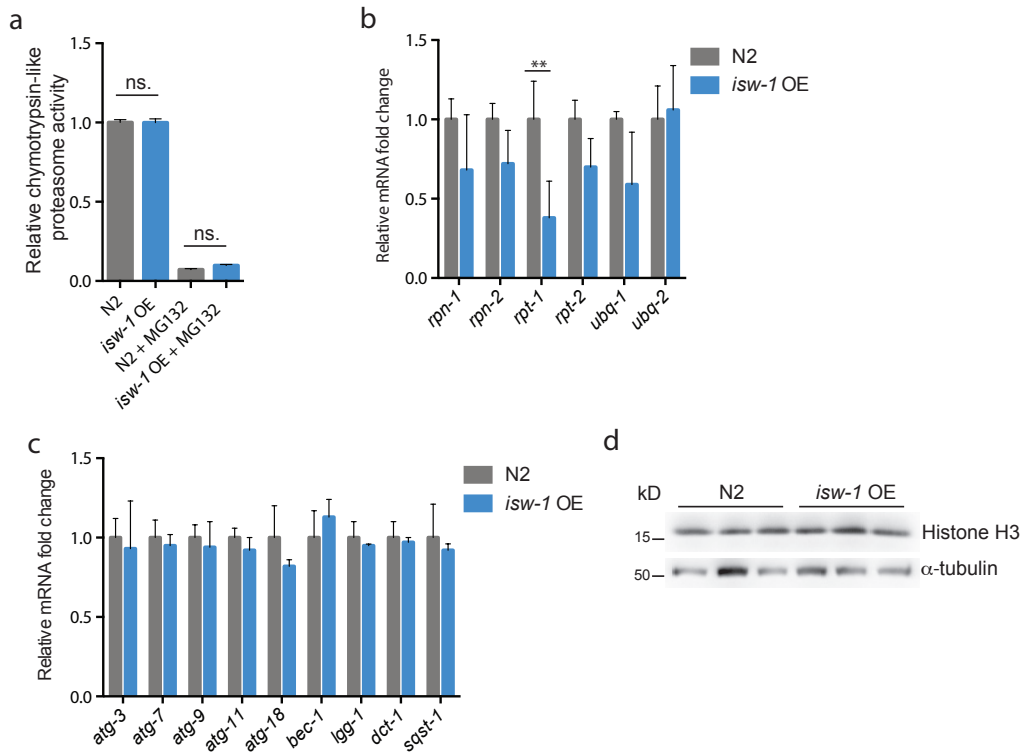

**Supplementary Figure 4 *isw-1* OE strain phenotype is likely independent of proteasome and autophagy.** (a) The proteasome activity in *isw-1* OE strain. Worms were collected for proteasome activity assay at day 2 of adulthood. Chymotrypsin-like proteasome activity was measured by using Suc-LLVY-AMC fluorescent peptide. Results shown are from one biological replicate. Bars represent peptide cleavage relative to N2 with error bars indicating mean  $\pm$  s.d. of three technical replicates (one-way ANOVA with Tukey's post test). (b) The expression of proteasomal 19S genes (*rpn-1*, *rpn-2*, *rpt-1* and *rpt-2*) and ubiquitin (*ubq-1* and *ubq-2*) in N2 and *isw-1* OE strain. (c) The expression of autophagy and mitophagy genes in N2 and *isw-1* OE strain. In (b) and (c), worms were collected for qRT-PCR analysis at L4 stage. Bars represent mRNA levels relative to N2 with error bars indicating mean  $\pm$  s.d. of three biological replicates, each with three technical replicates (\*\* $P < 0.01$ ; unpaired Student's *t*-test). (d) Histone H3 Western blots from N2 and *isw-1* OE worms. Results shown are from three biological replicates.

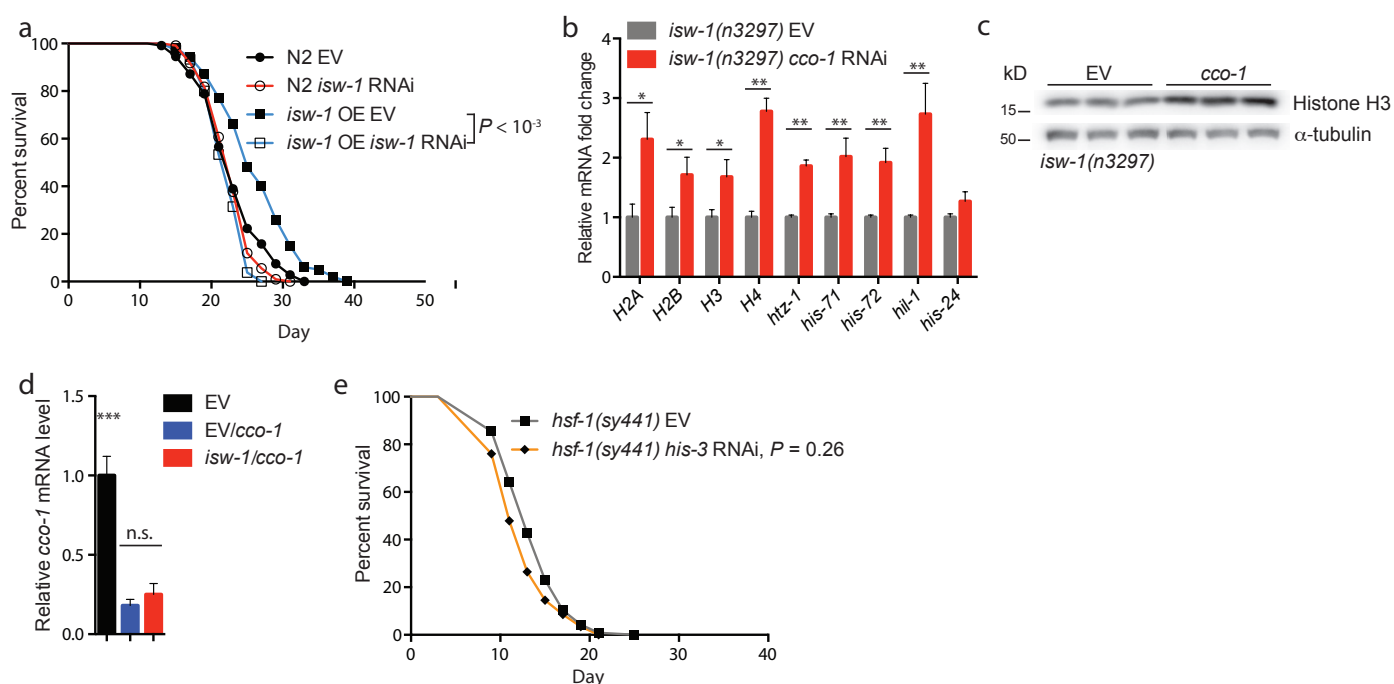

**Supplementary Figure 5 ISW-1 regulates lifespan, but not histone levels.** (a) Lifespan of N2 and *isw-1* OE strain on *isw-1* RNAi. (b) Histone gene expression in *isw-1(n3297)* mutants after *cco-1* RNAi measured with qRT-PCR. The H2A primer pairs have full sequence alignment with *his-12*, *his-16*, *his-30*, *his-33* and *his-43*, H2B pairs with *his-11*, *his-15*, *his-29*, *his-34* and *his-44*, H3 pairs with *his-2*, *his-6*, *his-27*, *his-49* and *his-40* (predicted pseudogene) and H4 pairs with *his-5*, *his-18*, *his-28*, *his-38* and *his-50*. Worms were collected for qRT-PCR analysis at L4 stage. Bars represent mRNA levels relative to empty vector with error bars indicating mean  $\pm$  s.d. of three biological replicates, each with three technical replicates (\* $P < 0.05$ , \*\* $P < 0.01$ ; unpaired Student's *t*-test). (c) Histone H3 Western blots from *isw-1(n3297)* mutants after treatment with *cco-1* RNAi. Results shown are from three biological replicates. (d) *isw-1* knockdown does not affect the *cco-1* knockdown efficiency. RNAi treatment was initiated within L1 larvae of the generation used for qRT-PCR analysis (RNAi regimen ii, see Fig. 3a). N2 worms were collected for qRT-PCR analysis at L4 stage. Bars represent *cco-1* mRNA level relative to empty vector with error bars indicating mean  $\pm$  s.d. of three biological replicates, each with three technical replicates (\*\* $P < 0.001$ ; one-way ANOVA with Tukey's post test). (e) Lifespan of *hsf-1(sy441)* on *his-3* RNAi. See Supplementary table 2 for lifespan statistics.

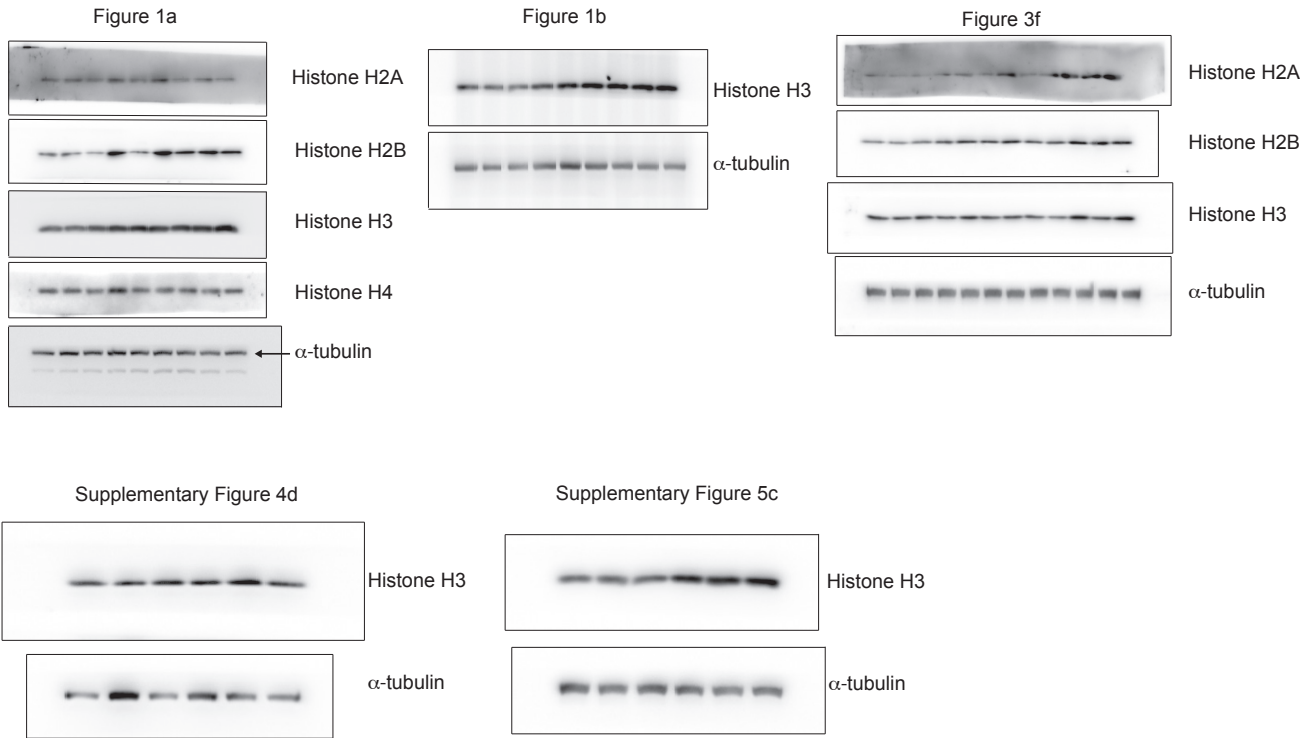

**Supplementary Figure 6 Uncropped Western blots presented in this manuscript.** Western blots were made by cutting the membrane based on molecular weight and incubating the cut slice with indicated antibody. Pictures, which were taken with Azure Western blot imaging system, show membrane slices from where the Western blot images were cropped.

**Supplementary Table 1 Manually-curated genesets for GSEA.**

| Gene                                                           | WormBase ID    | Gene                             | WormBase ID    | Gene                        | WormBase ID    |
|----------------------------------------------------------------|----------------|----------------------------------|----------------|-----------------------------|----------------|
| <b>HSP40, HSP60, HSP70 and HSP90 class heat shock proteins</b> |                | <b>Small heat shock proteins</b> |                | <b>Chromatin remodelers</b> |                |
| <i>dnj-1</i>                                                   | WBGene00001019 | <i>hsp-12.1</i>                  | WBGene00011906 | <i>arp-1</i>                | WBGene00007434 |
| <i>dnj-10</i>                                                  | WBGene00001028 | <i>hsp-12.2</i>                  | WBGene00002011 | <i>C17E4.6</i>              | WBGene00007645 |
| <i>dnj-12</i>                                                  | WBGene00001030 | <i>hsp-12.3</i>                  | WBGene00002012 | <i>ekl-4</i>                | WBGene00013676 |
| <i>dnj-13</i>                                                  | WBGene00001031 | <i>hsp-16.2</i>                  | WBGene00002016 | <i>gfl-1</i>                | WBGene00001585 |
| <i>dnj-19</i>                                                  | WBGene00001037 | <i>hsp-16.41</i>                 | WBGene00002018 | <i>hsp-1</i>                | WBGene00002005 |
| <i>F54F2.9</i>                                                 | WBGene00018836 | <i>hsp-16.48</i>                 | WBGene00002019 | <i>htz-1</i>                | WBGene00019947 |
| <i>hsp-60</i>                                                  | WBGene00002025 | <i>hsp-17</i>                    | WBGene00002021 | <i>isw-1</i>                | WBGene00002169 |
| <i>F44E5.5</i>                                                 | WBGene00009692 | <i>hsp-43</i>                    | WBGene00002024 | <i>let-418</i>              | WBGene00002637 |
| <i>F44E5.4</i>                                                 | WBGene00009691 | <i>sip-1</i>                     | WBGene00004798 | <i>let-526</i>              | WBGene00002717 |
| <i>F11F1.1</i>                                                 | WBGene00008714 | <i>Y55F3BR.6</i>                 | WBGene00021943 | <i>lin-53</i>               | WBGene00003036 |
| <i>hsp-1</i>                                                   | WBGene00002005 | <i>ZK1128.7</i>                  | WBGene00014233 | <i>mep-1</i>                | WBGene00003218 |
| <i>hsp-3</i>                                                   | WBGene00002007 |                                  |                | <i>mrg-1</i>                | WBGene00003406 |
| <i>hsp-4</i>                                                   | WBGene00002008 |                                  |                | <i>nurf-1</i>               | WBGene00009180 |
| <i>hsp-6</i>                                                   | WBGene00002010 |                                  |                | <i>pyp-1</i>                | WBGene00008149 |
| <i>hsp-70</i>                                                  | WBGene00002026 |                                  |                | <i>rba-1</i>                | WBGene00004312 |
| <i>hsp-110</i>                                                 | WBGene00016250 |                                  |                | <i>snfc-5</i>               | WBGene00011111 |
| <i>stc-1</i>                                                   | WBGene00006059 |                                  |                | <i>ssl-1</i>                | WBGene00007027 |
| <i>hsp-75</i>                                                  | WBGene00020110 |                                  |                | <i>swn-1</i>                | WBGene00004203 |
| <i>enpl-1</i>                                                  | WBGene00011480 |                                  |                | <i>swn-2.2</i>              | WBGene00015971 |
| <i>daf-21</i>                                                  | WBGene00000915 |                                  |                | <i>swn-3</i>                | WBGene00022182 |
|                                                                |                |                                  |                | <i>swn-4</i>                | WBGene00004204 |
|                                                                |                |                                  |                | <i>swn-6</i>                | WBGene00022774 |

|  |  |  |  |               |                |
|--|--|--|--|---------------|----------------|
|  |  |  |  | <i>xnp-1</i>  | WBGene00006961 |
|  |  |  |  | <i>zhit-1</i> | WBGene00016992 |

**Supplementary Table 2 Summary of *C. elegans* lifespan experiments.**

| <b>Genotype, RNAi and treatment</b>    | <b>mean lifespan<br/>± SE (days)</b> | <b>variation compared to control (%)</b> | <b>P-values against control</b> | <b>N (trials)</b> |
|----------------------------------------|--------------------------------------|------------------------------------------|---------------------------------|-------------------|
| <b>Figure 3b</b>                       |                                      |                                          |                                 |                   |
| N2, EV, RNAi regimen i                 | 21.8 ± 0.36                          |                                          |                                 | 104 (1)           |
| N2, <i>isw-1</i> RNAi, RNAi regimen i  | 19.3 ± 0.2                           | - 11.5                                   | <10 <sup>-3</sup>               | 110 (1)           |
| N2, <i>mep-1</i> RNAi, RNAi regimen i  | 24.7 ± 0.46                          | + 11.7                                   | <10 <sup>-3</sup>               | 104 (1)           |
| <b>Figure 3b</b>                       |                                      |                                          |                                 |                   |
| N2, EV, RNAi regimen i                 | 20.1 ± 0.24                          |                                          |                                 | 212 (2)           |
| N2, <i>nurf-1</i> RNAi, RNAi regimen i | 21.5 ± 0.26                          | + 6.5                                    | <10 <sup>-3</sup>               | 212 (2)           |
| <b>Figure 3b</b>                       |                                      |                                          |                                 |                   |
| N2, EV, RNAi regimen i                 | 21.3 ± 0.36                          |                                          |                                 | 110 (1)           |
| N2, <i>swn-3</i> RNAi, RNAi regimen i  | 20.9 ± 0.34                          | - 1.9                                    | 0.3                             | 109 (1)           |
| <b>Figure 4a-b</b>                     |                                      |                                          |                                 |                   |
| N2, EV, RNAi regimen i                 | 22.1 ± 0.35                          |                                          |                                 | 202 (2)           |
| N2, <i>isw-1</i> RNAi, RNAi regimen i  | 18.5 ± 0.1                           | -16.3                                    | <10 <sup>-3</sup>               | 214 (2)           |
| N2, EV, RNAi regimen ii                | 21.1 ± 0.55                          |                                          |                                 | 90 (1)            |
| N2, <i>isw-1</i> RNAi, RNAi regimen ii | 21.2 ± 0.37                          | + 0.5                                    | 0.43                            | 95 (1)            |



**Figure 4c**

|                                              |             |        |                   |         |
|----------------------------------------------|-------------|--------|-------------------|---------|
| N2, EV, RNAi regimen i                       | 20.9 ± 0.28 |        |                   | 219 (2) |
| N2, <i>isw-1</i> RNAi, RNAi regimen i        | 18.3 ± 0.1  | - 12.4 | <10 <sup>-3</sup> | 227 (2) |
| N2, <i>isw-1</i> RNAi → EV, RNAi regimen iii | 21.5 ± 0.27 | + 2.8  | 0.29              | 214 (2) |

**Figure 5c**

|                     |             |        |                   |         |
|---------------------|-------------|--------|-------------------|---------|
| N2, EV              | 20.6 ± 0.2  |        |                   | 432 (4) |
| <i>isw-1</i> OE, EV | 24.8 ± 0.24 | + 16.9 | <10 <sup>-3</sup> | 436 (4) |

**Figure 5d**

|                              |             |                   |                                          |         |
|------------------------------|-------------|-------------------|------------------------------------------|---------|
| N2, EV                       | 20.1 ± 0.21 |                   |                                          | 317 (3) |
| N2, 4 sHSP RNAi              | 20.3 ± 0.9  | + 1               | 0.9                                      | 306 (3) |
| <i>isw-1</i> OE, EV          | 24.7 ± 0.28 | + 18.6            | <10 <sup>-3</sup>                        | 307 (3) |
| <i>isw-1</i> OE, 4 sHSP RNAi | 22.5 ± 0.27 | + 10.7<br># - 8.9 | <10 <sup>-3</sup><br># <10 <sup>-3</sup> | 309 (3) |

**Figures 6a**

|                                         |             |                  |                                          |         |
|-----------------------------------------|-------------|------------------|------------------------------------------|---------|
| N2, EV                                  | 21 ± 0.24   |                  |                                          | 211 (2) |
| N2, <i>cco-1</i> RNAi                   | 27.4 ± 0.36 | + 23.4           | <10 <sup>-3</sup>                        | 203 (2) |
| <i>isw-1(n3297)</i> , EV                | 21 ± 0.21   | 0                | 0.21                                     | 183 (2) |
| <i>isw-1(n3297)</i> , <i>cco-1</i> RNAi | 23.2 ± 0.24 | + 9.5<br>¶ + 9.5 | <10 <sup>-3</sup><br>¶ <10 <sup>-3</sup> | 213 (2) |

**Figure 6b**

|                                              |             |                 |                                          |         |
|----------------------------------------------|-------------|-----------------|------------------------------------------|---------|
| N2, EV, RNAi regimen ii                      | 20.6 ± 0.28 |                 |                                          | 202 (2) |
| N2, EV/ <i>cco-1</i> RNAi, RNAi regimen ii   | 26.4 ± 0.45 | + 22            | <10 <sup>-3</sup>                        | 215 (2) |
| N2, EV/ <i>isw-1</i> RNAi, RNAi regimen ii   | 21.3 ± 0.2  | + 3.3           | 0.87                                     | 203 (2) |
| N2, <i>isw-1/cco-1</i> RNAi, RNAi regimen ii | 23.5 ± 0.33 | + 12.3<br>*- 11 | <10 <sup>-3</sup><br>* <10 <sup>-3</sup> | 224 (2) |

**Figure 6c**

|                       |             |       |                   |         |
|-----------------------|-------------|-------|-------------------|---------|
| N2, EV                | 20.0 ± 0.18 |       |                   | 422 (4) |
| N2, <i>his-3</i> RNAi | 21.4 ± 0.18 | + 6.5 | <10 <sup>-3</sup> | 414 (4) |

**Figure 6d**

|                                         |             |      |      |         |
|-----------------------------------------|-------------|------|------|---------|
| <i>isw-1(n3297)</i> , EV                | 19 ± 0.21   |      |      | 183 (2) |
| <i>isw-1(n3297)</i> , <i>his-3</i> RNAi | 18.2 ± 0.22 | -4.2 | 0.09 | 196 (2) |

**Figure 6e**

|                                      |             |                   |                             |         |
|--------------------------------------|-------------|-------------------|-----------------------------|---------|
| N2, EV                               | 22.8 ± 0.35 |                   |                             | 193 (2) |
| N2, EV/ <i>his-3</i> RNAi            | 24.9 ± 0.42 | + 8.4             | <10 <sup>-3</sup>           | 203 (2) |
| N2, EV/ <i>cco-1</i> RNAi            | 29.2 ± 0.46 | + 21.9            | <10 <sup>-3</sup>           | 212 (2) |
| N2, <i>his-3</i> / <i>cco-1</i> RNAi | 28.6 ± 0.21 | + 20.3<br>^ - 2.1 | <10 <sup>-3</sup><br>^ 0.62 | 198 (2) |

**Supplementary Figure 5a**

|                                                     |             |                 |                             |         |
|-----------------------------------------------------|-------------|-----------------|-----------------------------|---------|
| N2, EV, RNAi regimen ii                             | 22.0 ± 0.27 |                 |                             | 214 (2) |
| N2, <i>isw-1</i> RNAi, RNAi regimen ii              | 22.2 ± 0.21 | + 0.9           | 0.3                         | 209 (2) |
| <i>isw-1</i> OE, EV, RNAi regimen ii                | 24.8 ± 0.31 | + 11.3          | <10 <sup>-3</sup>           | 198 (2) |
| <i>isw-1</i> OE, <i>isw-1</i> RNAi, RNAi regimen ii | 22.0 ± 0.18 | + 0<br>& - 11.3 | 0.03<br>& <10 <sup>-3</sup> | 213 (2) |

**Supplementary Figure 5e**

|                                         |             |       |      |         |
|-----------------------------------------|-------------|-------|------|---------|
| <i>hsf-1(sy441)</i> , EV                | 11 ± 0.22   |       |      | 231 (2) |
| <i>hsf-1(sy441)</i> , <i>his-3</i> RNAi | 10.6 ± 0.22 | - 3.6 | 0.26 | 236 (2) |

# Compared to *isw-1* OE, EV treatment

¶ Compared to *isw-1(n3297)*, EV treatment

\* Compared to EV/*cco-1* RNAi treatment

^ Compared to EV/*cco-1* RNAi treatment

& Compared to *isw-1* OE, EV treatment

**Supplementary Table 3. Sequences of oligonucleotides used for cloning in this study.**

| Region                | Forward (5' → 3')              | Reverse (5' → 3')                       |
|-----------------------|--------------------------------|-----------------------------------------|
| <i>isw-1</i> promoter | CTAACATGTTGACCACATGCTTTCCAACG  | CTAACCGGTTTTCTGTGACAATCACCAATTAACAAC    |
| <i>isw-1</i> ORF      | CTAACCGGTATGTCTGGTTCACGAGTCTTC | CTAGCTAGCTTATTTAGGAGTAGCTTTGACTTTCTTAGC |
| <i>myo-2</i> promoter | ATAGCGTGCGGAGGTTTAGAG          | GTAACCGGTTTTCTGTGTCTGACGATCGAGG         |

**Supplementary Table 4. Sequences of oligonucleotides used for qRT-PCR in this study.**

| Gene                                  | Forward (5' → 3')      | Reverse (5' → 3')       |
|---------------------------------------|------------------------|-------------------------|
| <i>act-1</i>                          | TCGGTATGGGACAGAAGGAC   | CATCCCAGTTGGTGACGATA    |
| <i>pmp-3</i>                          | GTTCCCGTGTTCACTCAT     | ACACCGTCGAGAAGCTGTAGA   |
| <i>hsp-1</i>                          | GACAAGAAGGGACACGGAGA   | GATGAGTGTCTCCAGCGGTA    |
| <i>hsp-4</i>                          | GACATCGAGCGCATGATCAA   | CCTTGTCGGCGATTTGAGTT    |
| <i>hsp-6</i>                          | AGAGCCAAGTTCGAGCAGAT   | TCTTGAACAGTGGCTTGCAC    |
| <i>hsp-60</i>                         | GGAAGCCCAAAGATCACAAA   | CAGCCTCCTCATTAGCCTTG    |
| <i>hsp-12.1</i>                       | AATTACAACCTGACTCGGCGG  | CGATTCCGTTACCTTCACA     |
| <i>hsp-12.2</i>                       | CAAGGTTTCCGGACAAGAGC   | TGGAAGCAGTGATGGTGAGA    |
| <i>hsp-12.3</i>                       | TGGACTTGAGGCTCACAACCT  | TGATGGTAGCTGGATCGGTT    |
| <i>hsp-12.6</i>                       | GATTGGCCACTTCAAAAAGGG  | TCCTTCTTTACATTGTGCTCCA  |
| <i>hsp-16.1/</i><br><i>hsp-16.11</i>  | ACCACTATTTCCGTCCAGCT   | ATCTTCTGGCTTGAACCTGCG   |
| <i>hsp-16.2</i>                       | AGATGTAGATGTTGGTGCAGT  | TCTCTTCGACGATTGCCTGT    |
| <i>hsp-16.41</i>                      | TGCTCCGTTCTCCATATTCTGA | AGAGACATCGAGTTGAACCGA   |
| <i>hsp-16.48/</i><br><i>hsp-16.49</i> | CTCATGCTCCGTTCTCCATT   | ACAATCTCTCCAATATTGTGCGA |
| <i>rpn-1</i>                          | TCTCTTTCTCGACGCCAAT    | GCTTGACCAACACGAACAGA    |
| <i>rpn-2</i>                          | TGGAACAGGAAACATGGAAGC  | GTCCTCGTTCTTCTCTCCGA    |
| <i>rpt-1</i>                          | ATTGATGCTGTTGGAGGTGC   | AGAGTGTCCGGTCTGTTTGT    |

|                |                           |                         |
|----------------|---------------------------|-------------------------|
| <i>rpt-2</i>   | GAGACAAGAAGAAGAGCGCG      | AGAAGGACTGAACATCCCCGG   |
| <i>ubq-1</i>   | CCTGGAGGTGGAGGCTTC        | GTAGTCAGACAGGGTGCGG     |
| <i>ubq-2</i>   | TGGAGGAATCATCGAGCCAT      | CCGCACTTCTTCTTTCTGCA    |
| <i>swn-1</i>   | TCAGCAGCAGAGGGGATATG      | TCCACCTTCATGATGTCCCC    |
| <i>swn-3</i>   | GAATGGGAGGAGAAGCTTGC      | CCGGCTTCTCCTTGACATTT    |
| <i>swn-4</i>   | CTTCTCGTCCCTCAACCAGT      | GCTTGATTTCACCGGTCTG     |
| <i>swn-8</i>   | CCGAGTGGCTGGAATGATTG      | TGCAGCATCCGAGTTTGTAG    |
| <i>isw-1</i>   | GCAAAGTACAAGGCTCCGTT      | TCTGAATTGTGGTGCCATGC    |
| <i>nurf-1</i>  | TGGGGAATCAACAACCGAGA      | ACTTTGCGGATGTTGCTGTT    |
| <i>let-418</i> | TTCTTTCGTTGAAGGTGCCG      | TCAACAACAAGAGCTCCCCA    |
| <i>mep-1</i>   | TCAACCATCCAGCAAAAGCC      | TCGCAAACCTTGACTTGGTGG   |
| <i>mrg-1</i>   | GCATCATGATTGGAGTTCACGA    | ATTGATTCGCTCCAACCTCCG   |
| <i>atg-3</i>   | GTTTCGGACCTATGATTTGCACA   | CAGACGGATGAGCTTCAACAG   |
| <i>atg-7</i>   | TCCACTCAAGACACCAGCC       | GCTGAAACTGTGCAGCGATA    |
| <i>atg-9</i>   | GGCCGCCATCCACTCATCGG      | TTGACGTCGTGCCGCCGTAG    |
| <i>atg-11</i>  | TCGAGAATGGAGAGGAGCAC      | TGCAAAACTTGGTCACCTCC    |
| <i>atg-18</i>  | AAATGGACATCGGCTCTTTG      | TGATAGCATCGAACCATCCA    |
| <i>bec-1</i>   | CTGTCAGCATCCGTTGAGGT      | AGAGCGTCAGAGCAATCATTACA |
| <i>lgg-1</i>   | AGCACCAAAGTCAAAGCTCCA     | CTTCTCGTGATGGTCCTGG     |
| <i>dct-1</i>   | GCAAAAGCCGTCTCAAACCC      | ACCCACGATTCTGACATACCA   |
| <i>sqst-1</i>  | GATCCTCCGACCACTCCAAA      | TGGAAGTGGTGGAACGATCA    |
| <i>cco-1</i>   | GCTCGTCTTGCTGGAGATGATCGTT | GGTCGGCGTCGACTCCCTTG    |
| <i>H2A</i>     | GCCCCAAGACATCTTCAACT      | GGAAGAAGAACAGCTTGGATG   |
| <i>H2B</i>     | CGTCTTGCTCACTACAACAAG     | TTGGTCCCTCAGACACGG      |
| <i>H3</i>      | TCTTCAAGAGGCTGCCGAG       | AGCACGTTCTCCTCGGATAC    |
| <i>H4</i>      | TCGTGGAGTTCTCAAGGTGT      | CCTCCGAATCCGTACAGAGT    |

|                                            |                       |                           |
|--------------------------------------------|-----------------------|---------------------------|
| <i>htz-1</i>                               | ATGGCTGGAGGAAAAGGAAA  | GCTGGAAGTGGTTCTCTGCT      |
| <i>his-71</i>                              | AGCTCCTCGCAAGCAGCT    | GAAACAGCTCAACGTTTAT       |
| <i>his-72</i>                              | CTTCCAGTCGGCTGCCAT    | TCGAGAATTGGTGATGGAGC      |
| <i>hil-1</i>                               | GAATTCCGGTTCAGACCAAA  | TCCACGCTTTTTTCATTGTTG     |
| <i>his-24</i>                              | AAAGGTCCCAAAGGCTAAGG  | ACTTGAGGATTGCCTGCTTG      |
| <i>hsp16.1/48</i><br>HRE1 ChIP-<br>qRT-PCR | TCCTCTGAACACGATTGGCT  | GCGTCTCTTTGCACCTATGG      |
| <i>hsp16.1/48</i><br>HRE2 ChIP-<br>qRT-PCR | TTCTGAATGTGAGTCGCCCT  | AGTGAATGTTGTTTGGTTCCGGT   |
| <i>hsp16.2/41</i><br>HRE1 ChIP-<br>qRT-PCR | TCTGAGCCCGCTTTCCTTAT  | GCGTCTCTTTGCACCCAC        |
| <i>hsp16.2/41</i><br>HRE2 ChIP-<br>qRT-PCR | TCCATGTACCGAATGTGAGTC | TGTTCCGGTATTTATTTTCAACGGT |
| <i>trt-1</i> ChIP-<br>qRT-PCR              | TCGGAGATGAAGCTGTCCG   | CGGAGAGAAGAGGAGTACGG      |
